# Supplementary material for: In Vitro Antiviral Effect and Potential Neuroprotection of Salvadora persica L. Stem Bark Extract against Lipopolysaccharides-Induced Neuroinflammation in Mice: LC-ESI-MS/MS Analysis of the Methanol Extract
Source: MDPI journal article supplement (doi:10.3390/ph16030398), 2023-03-06

# ***In Vitro* Antiviral Effect and Potential Neuroprotection of *Salvadora persica* L. Stem Bark Extract against Lipopolysaccharides-Induced Neuroinflammation in Mice: LC-ESI-MS/MS Analysis of the Methanol Extract**

Reem Binsuwaidan <sup>1,†</sup>, Walaa A. Negm <sup>2,\*;†</sup>, Engy Elekhawy <sup>3,\*</sup>, Nashwah G. M. Attallah <sup>4</sup>,  
Eman Ahmed <sup>5,6</sup>, Sameh Magdeldin <sup>6,7</sup>, Ehssan Moglad <sup>8</sup>, Sally Abdallah Mostafa <sup>9</sup>  
and Suzy A. El-Sherbeni <sup>2</sup>

<sup>1</sup> Department of Pharmaceutical Science, College of Pharmacy, Princess Nourah Bint Abdulrahman University, P.O. Box 84428, Riyadh 11671, Saudi Arabia

<sup>2</sup> Department of Pharmacognosy, Faculty of Pharmacy, Tanta University, Tanta 31527, Egypt

<sup>3</sup> Department of Pharmaceutical Microbiology, Faculty of Pharmacy, Tanta University, Tanta 31527, Egypt

<sup>4</sup> The Egyptian Drug Authority (EDA), Previously NODCAR, Giza 8655, Egypt

<sup>5</sup> Department of Pharmacology, Faculty of Veterinary Medicine, Suez Canal University, Ismailia 41522, Egypt

<sup>6</sup> Proteomics and Metabolomics Research Program, Department of Basic Research, Children's Cancer Hospital 57357, Cairo 11441, Egypt

<sup>7</sup> Department of Physiology, Faculty of Veterinary Medicine, Suez Canal University, Ismailia 41522, Egypt

<sup>8</sup> Department of Pharmaceutics, College of Pharmacy, Prince Sattam Bin Abdulaziz University, P.O. Box 173, Al-Kharj 11942, Saudi Arabia

<sup>9</sup> Department of Medical Biochemistry and Molecular Biology, Faculty of Medicine, Mansoura University, Mansoura 35516, Egypt

\* Correspondence: [walaa.negm@pharm.tanta.edu.eg](mailto:walaa.negm@pharm.tanta.edu.eg) (W.A.N.); [engy.ali@pharm.tanta.edu.eg](mailto:engy.ali@pharm.tanta.edu.eg) (E.E.)

† These authors contributed equally to this work.

**Table S1.** Primer sequences of the tested genes.

| Gene             | Primer Sequences                                      | Reference Sequences | PCR product size (bp) |
|------------------|-------------------------------------------------------|---------------------|-----------------------|
| <b>β-actin</b>   | F: CTGGCTCCTAGCACCATGAA<br>R: AGCTCAGTAACAGTCCGCCTA   | NM_007393.5         | 189bp                 |
| <b>Caspase 3</b> | F: AGCTTGGAACGGTACGCTAAG<br>R: AGTCCACTGACTTGCTCCCA   | NM_001284409.1      | 116bp                 |
| <b>IL- 6</b>     | F: ACCCCAATTTCCAATGCTCTCC<br>R: ATAACGCACTAGGTTTGCCGA | NM_031168.2         | 146bp                 |
| <b>TNF-α</b>     | F: CCACCACGCTCTTCTGTCTA<br>R: CCACTTGGTGGTTTGTGAGTG   | NM_001278601.1      | 126bp                 |
| <b>iNOS</b>      | F: GGTGAAGGGACTGAGCTGTTA<br>R: TGAAGAGAACTTCCAGGGGC   | NM_010927.4         | 163 bp                |
| <b>c-Jun</b>     | F: CCGAGAATTCCGTGACGACT<br>R: TAGCACTCACGTTGGTAGGC    | NM_010591.2         | 160BP                 |

**Figure S1:** Total ion chromatogram (negative mode) of LC-ESI-MS/MS of methanol extract of *Salvadora persica* stem bark

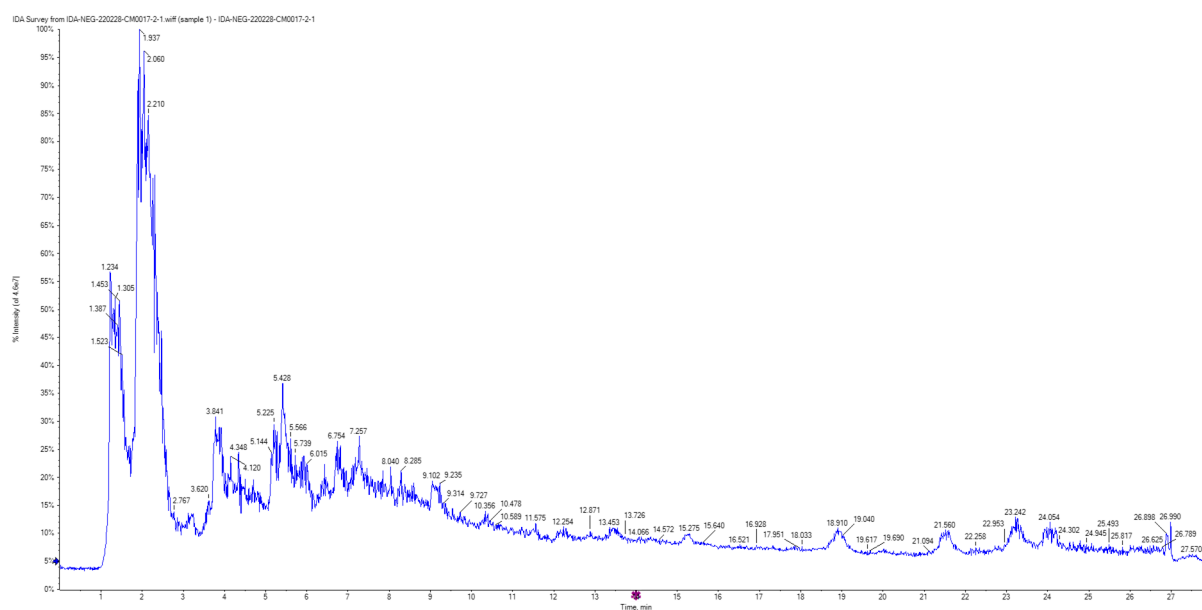

**Figure S2:** Total ion chromatogram (positive mode) of LC-ESI-MS/MS of methanol extract of *Salvadora persica* stem bark

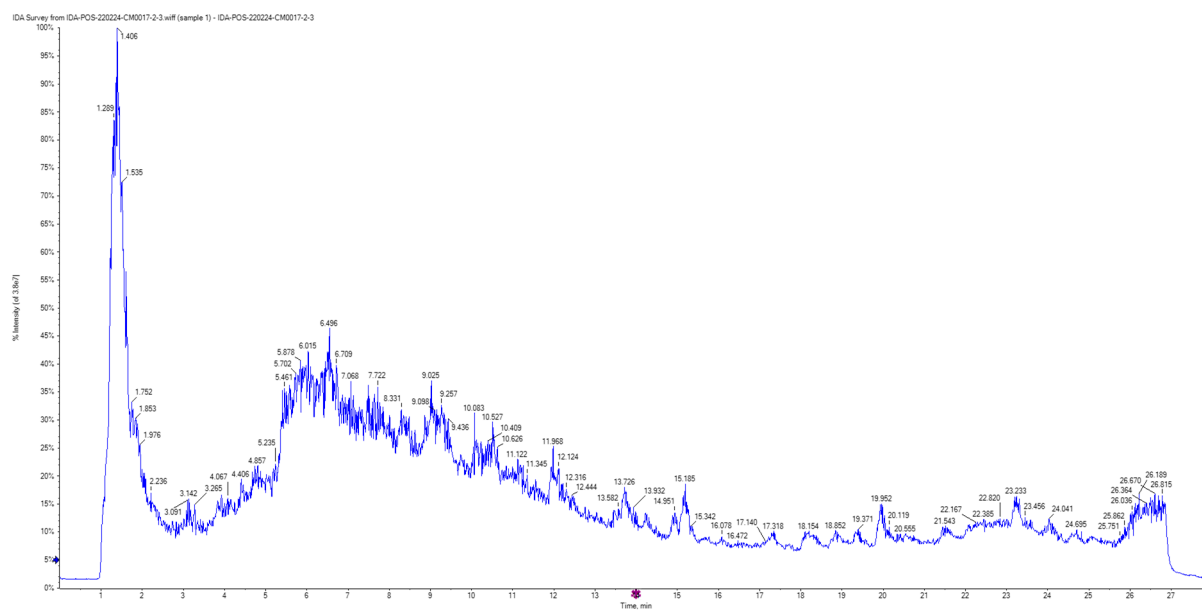

Supplement: s1 [file s1]
